# Supplementary material for: Comparison of functionalized carbon nanofibers and multi-walled carbon nanotubes as supports for Fe–Co nanoparticles
Source: Royal Society of Chemistry journal article supplement (doi:10.1039/c2ta00131d), 2012-11-28
Supplement: c2ta00131d.pdf [file c2ta00131d.pdf]

## COMPARISON OF FUNCTIONALIZED CARBON NANOFIBERS AND MULTI-WALLED CARBON NANOTUBES AS SUPPORTS FOR Fe-Co NANOPARTICLES

D. Vidick, M. Herlitschke, M. Devillers, C. Poleunis, A. Delcorte, R. P. Hermann, S. Hermans

### **Electronic Supplementary Information (ESI)**

#### **Experimental setup for pseudo in-situ XPS measurements**

For pseudo in-situ XPS measurements, the spectrometer is equipped with a reaction cell fitted on the sample transfer chamber. The powder sample is pressed in a small stainless steel trough of 4mm diameter and 0.5mm depth. This trough is inserted in a stainless steel stub in which it is maintained by a small spring. The cell body is made of quartz and is heated by a boron nitride insulated heater. The temperature is controlled by a k type thermocouple incorporated in the pin in which the sample stub is inserted. The requested temperature is adjusted using a MicroMega temperature programmer, the maximum temperature being 1000 °C at 1 mbar. A hand grip assembly is used to open and close the cell door in a vertical plane. Gas in and out lines are passing through the cell door and the reaction gas (here N<sub>2</sub>) is introduced via a precision micrometer valve in the quartz reaction cell. The base of the cell is cooled by a copper tube which, in turn, is cooled by a water cooled flange at the top of the cell housing. The door of the cell is cooled using compressed air. After reaction, the gas cell is pumped down, then it is opened and the stub holding the sample is transferred in the specimen transfer chamber and then the analysis chamber, where the XPS analyses are performed. Samples are thus never re-exposed to

air. The following experimental conditions were used for temperature programming: increase up to 300°C with a heating ramp of 100°C/h, keeping 1h at 300°C, and then decrease to room temperature.

Table S1. O/C XPS ratios for different oxidation reaction durations of MWCNT.

| XPS | Oxidation duration (refluxing HNO <sub>3</sub> ) |       |       |       |       |       |       |
|-----|--------------------------------------------------|-------|-------|-------|-------|-------|-------|
|     | 2h                                               | 4h    | 6h    | 8h    | 12h   | 16h   | 24h   |
| O/C | 0.055                                            | 0.060 | 0.065 | 0.054 | 0.054 | 0.059 | 0.085 |

(a)

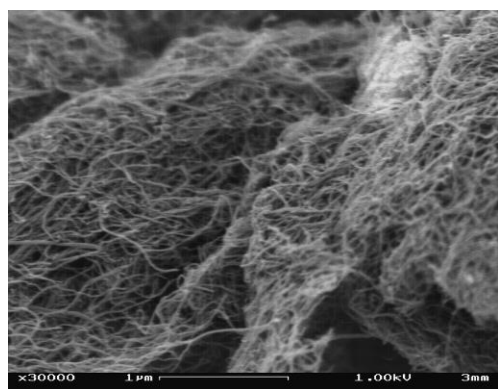

(b)

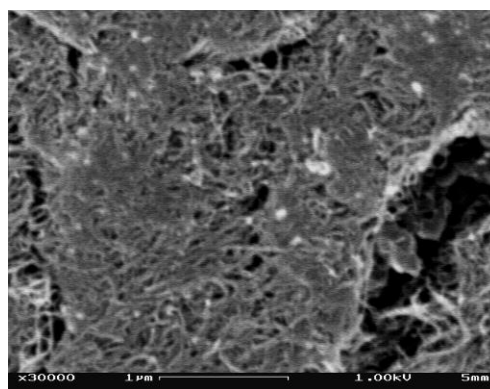

Figure S2. SEM images of MWCNT-OX : (a) after 2h and (b) after 24h of treatment with HNO<sub>3</sub> under refluxing conditions.

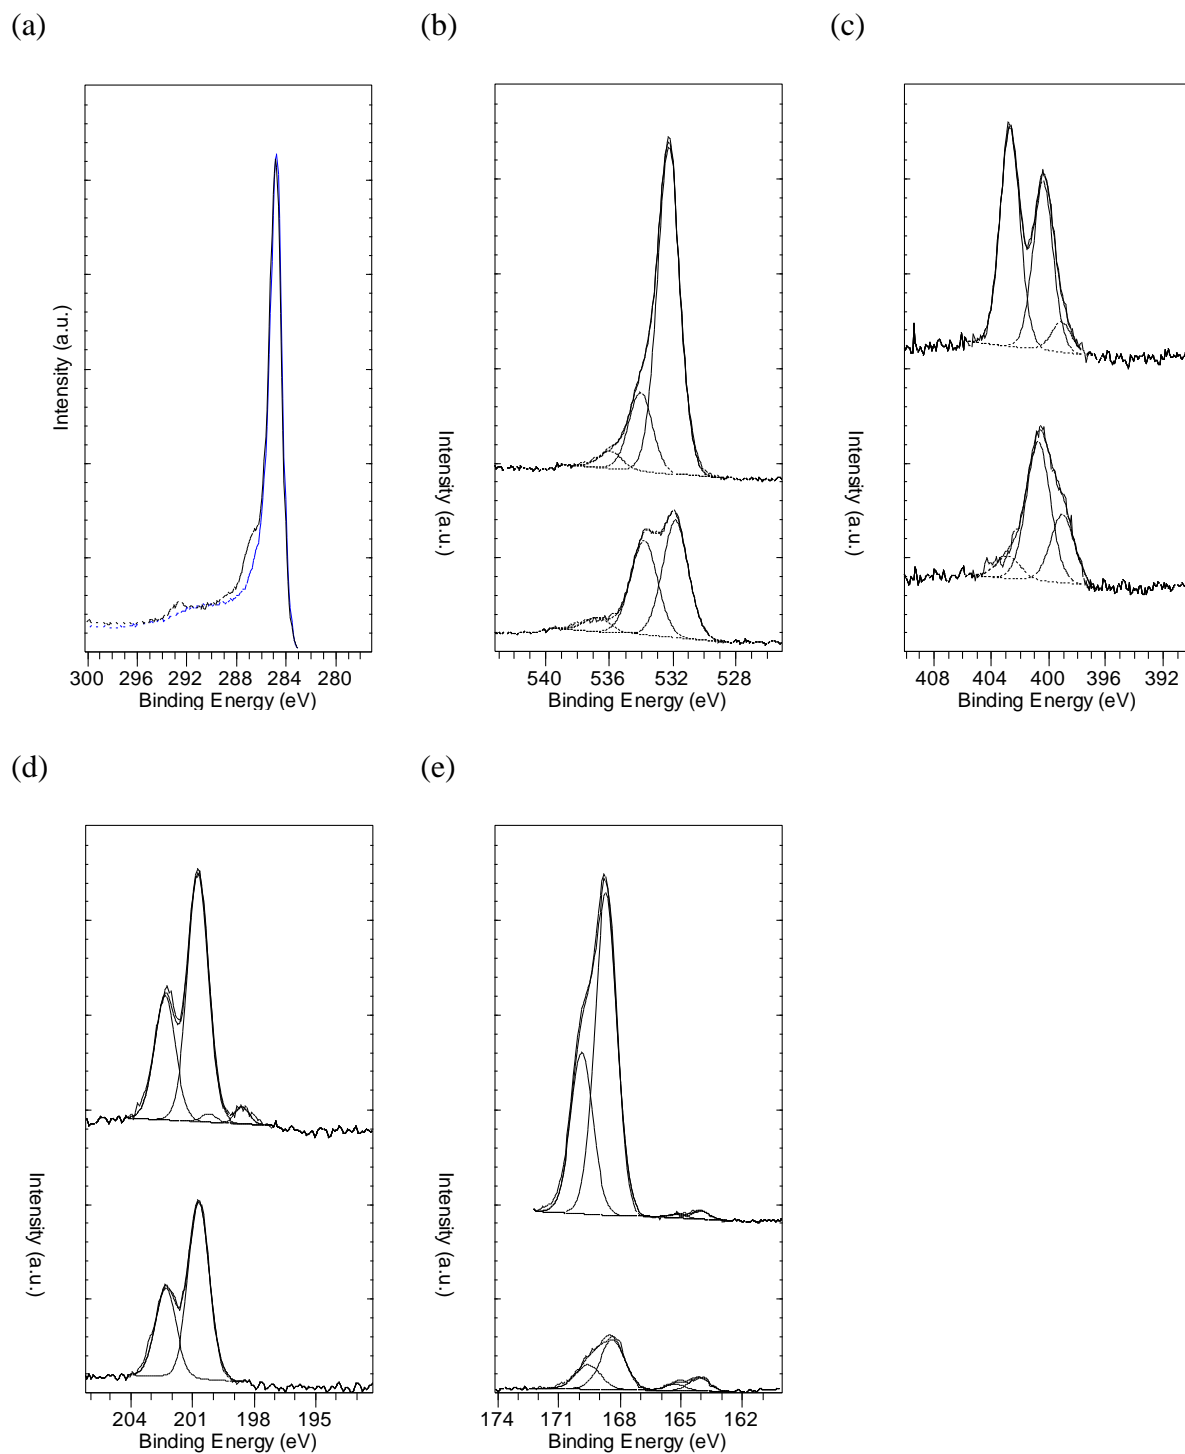

Figure S3. XPS spectra of CNF-NMe<sub>3</sub><sup>+</sup> at RT (top) and heated at 300°C (below) obtained in the tubular oven in the (a) C 1s, (b) O 1s, (c) N 1s, (d) Cl 2p, and (e) S 2p regions.

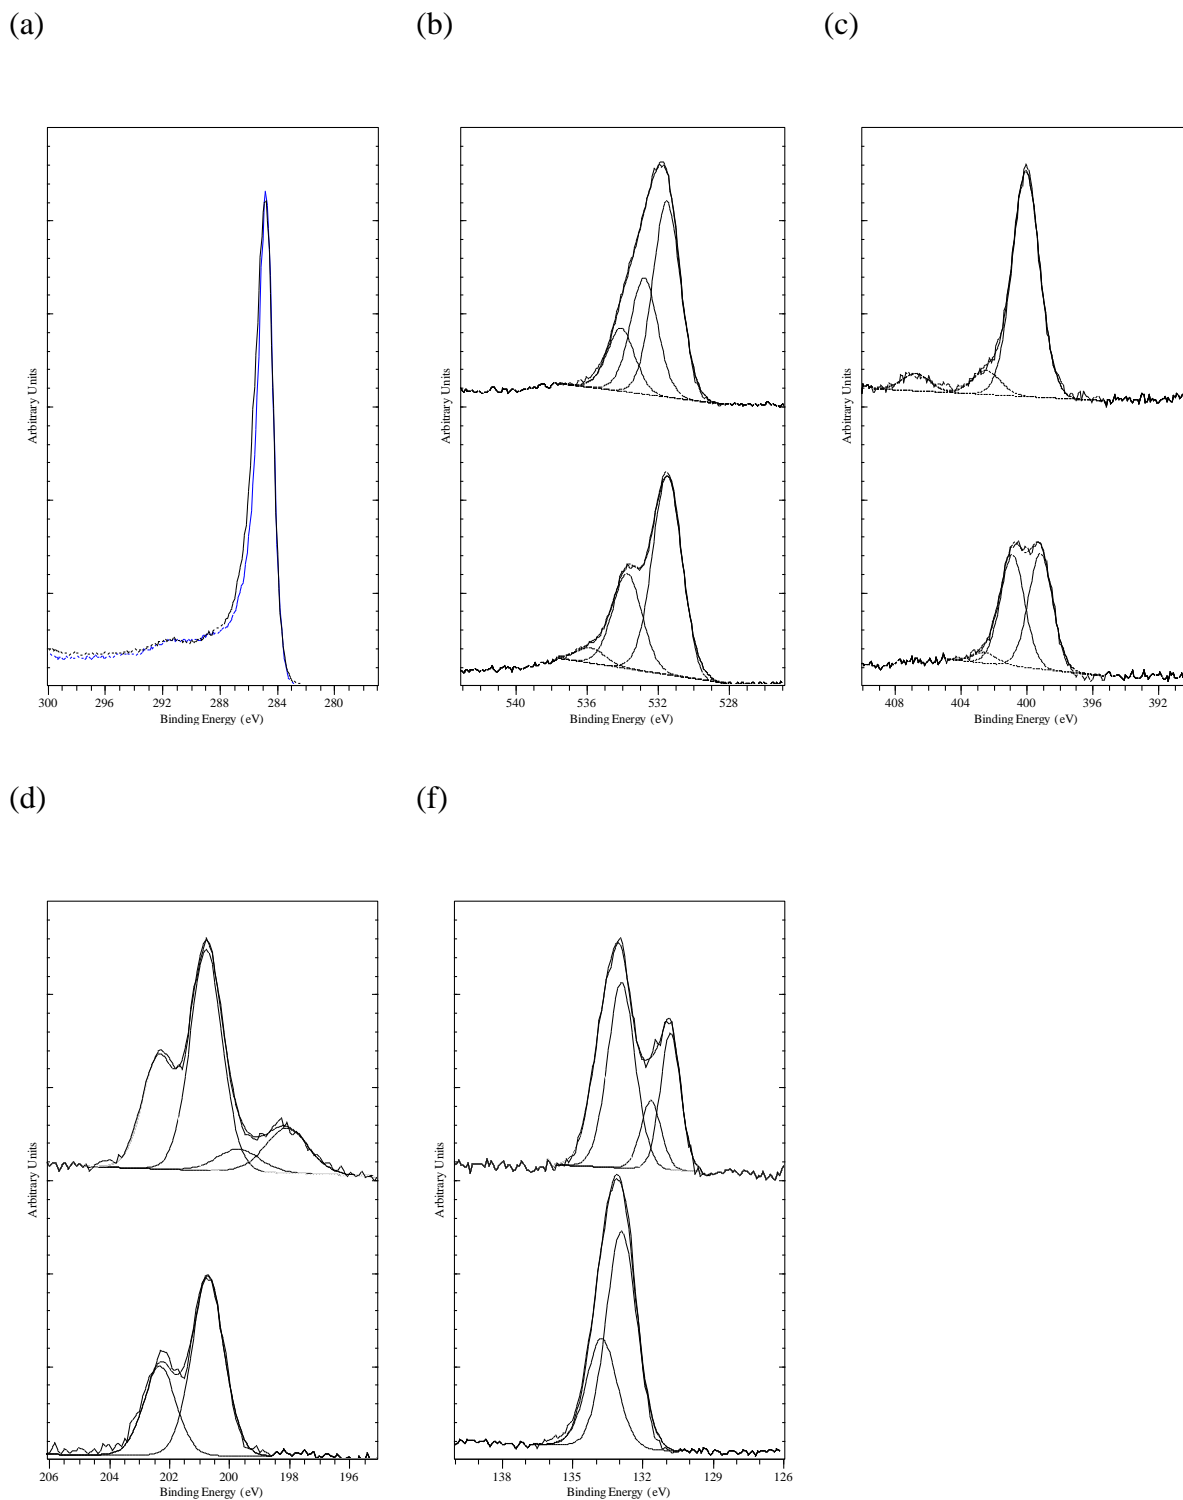

Figure S4. XPS spectra of CNF-PPh<sub>2</sub> at RT (top) and heated at 300°C (below) obtained in the tubular oven in the (a) C 1s, (b) O 1s, (c) N 1s, (d) Cl 2p, and (e) P 2p regions.

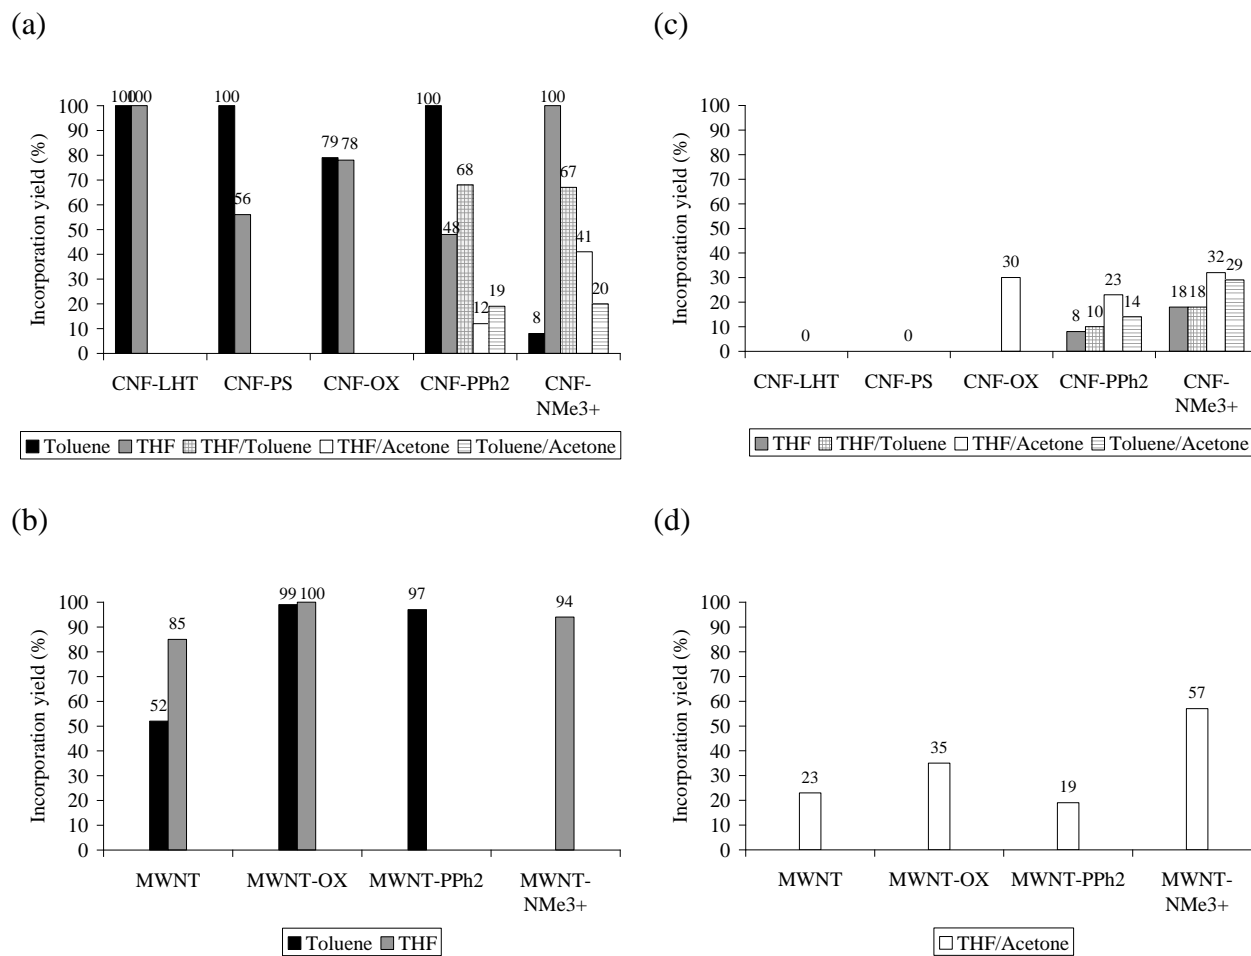

Fig. S5. Incorporation yield (%) of [HFeCo<sub>3</sub>(CO)<sub>12</sub>] (a) on CNF and (b) on MWCNT and of (NEt<sub>4</sub>)[FeCo<sub>3</sub>(CO)<sub>12</sub>] (c) on CNF and (d) on MWCNT.

Table S6. Carbonyl stretching frequencies of  $[\text{H}_n\text{FeCo}_3(\text{CO})_{12}]^{n-1}$  ( $n = 0, 1$ ) in different solvents.

| Cluster species                                 | Solvent(s)      | Solution color | $\nu_{\text{CO}}$ ( $\text{cm}^{-1}$ )              | Interpretation                 |
|-------------------------------------------------|-----------------|----------------|-----------------------------------------------------|--------------------------------|
| $[\text{HFeCo}_3(\text{CO})_{12}]$              | toluene         | purple         | 2103w 2060s 2051s 2028m 1986m<br>1881m              | Protonated, neutral            |
|                                                 | THF             | brown          | 2061w 2002s 1965w 1932m<br>1822m                    | Deprotonated,<br>charged       |
|                                                 | acetone         | brown          | 2106w 2063m 2051m 2005s<br>1971m 1933m              | Protonated and<br>deprotonated |
|                                                 | toluene/THF     | brown          | 2062w 2002s 1969w 1932m<br>1822m                    | Deprotonated,<br>charged       |
|                                                 | toluene/acetone | brown          | 2106w 2063m 2051m 2003s<br>1976m 1930m 1878m 1826m  | Protonated and<br>deprotonated |
|                                                 | THF/acetone     | brown          | 2062w 2003s 1968w 1932m<br>1820m                    | Deprotonated,<br>charged       |
|                                                 | $\text{CCl}_4$  | purple         | 2098w 2058s 2051s 2030m 1988m<br>1889s <sup>a</sup> | Protonated, neutral            |
| $(\text{NEt}_4)[\text{FeCo}_3(\text{CO})_{12}]$ | toluene         | -              | Not soluble                                         | -                              |
|                                                 | THF             | brown          | 2061w 2001s 1967w 1932m<br>1822m                    | Unchanged, charged             |
|                                                 | acetone         | brown          | 2063w 2005s 1969w 1932m<br>1826m <sup>a</sup>       | Unchanged, charged             |

<sup>a</sup> taken from: Armstrong RS, Bell T, Masters AF, Williams MA. Fischer-Tropsch catalysts derived from surface confined  $[\text{H}_n\text{FeCo}_3(\text{CO})_{12}]^{n-1}$  ( $n = 0, 1$ ). Polyhedron 1990; 9: 2815-22.

Table S7. Thermogravimetric analyses of pure clusters.

| Cluster                                                                 | Weight loss (%) | Final decomposition temperature (°C) | Calculated weight loss (%)       |
|-------------------------------------------------------------------------|-----------------|--------------------------------------|----------------------------------|
| [HFeCo <sub>3</sub> (CO) <sub>12</sub> ] ( <b>1</b> )                   | 56              | 200                                  | 59 (= 12 CO +H)                  |
| (NEt <sub>4</sub> )[FeCo <sub>3</sub> (CO) <sub>12</sub> ] ( <b>2</b> ) | 61              | 300                                  | 67 (= 12 CO + NEt <sub>4</sub> ) |

Table S8. Loading and XPS results for the incorporation of [HFeCo<sub>3</sub>(CO)<sub>12</sub>] (**1**) on different types of CNF.

| Sample | Support                           | Solvent <sup>a</sup> | Metal loading (wt.%) <sup>b</sup> | XPS                               |                     |                                                   |                     |                                                   |
|--------|-----------------------------------|----------------------|-----------------------------------|-----------------------------------|---------------------|---------------------------------------------------|---------------------|---------------------------------------------------|
|        |                                   |                      |                                   | Co/C <sub>calc</sub> <sup>c</sup> | Before activation   |                                                   | After activation    |                                                   |
|        |                                   |                      |                                   |                                   | Co/C <sub>exp</sub> | (Co/C) <sub>exp</sub> /<br>(Co/C) <sub>calc</sub> | Co/C <sub>exp</sub> | (Co/C) <sub>exp</sub> /<br>(Co/C) <sub>calc</sub> |
| CNF1   | CNF-LHT                           | Tol                  | 5.0                               | 0.008                             | 0.015               | 1.9                                               | 0.017               | 2.1                                               |
| CNF2   |                                   | THF                  | 5.1                               | 0.008                             | 0.013               | 1.7                                               | 0.024               | 3.0                                               |
| CNF3   | CNF-PS                            | Tol                  | 5.2                               | 0.008                             | 0.024               | 3.0                                               | 0.029               | 3.7                                               |
| CNF4   |                                   | THF                  | 2.8                               | 0.004                             | 0.011               | 2.9                                               | 0.011               | 2.7                                               |
| CNF5   | CNF-OX                            | Tol                  | 4.1                               | 0.006                             | 0.059               | 9.8                                               | 0.080               | 13.3                                              |
| CNF6   |                                   | THF                  | 4.0                               | 0.006                             | 0.065               | 10.8                                              | 0.055               | 9.1                                               |
| CNF7   |                                   | Tol                  | 0.4                               | 0.001                             | 0.037               | 37.4                                              | 0.043               | 42.9                                              |
| CNF8   |                                   | THF                  | 5.0                               | 0.008                             | 0.061               | 7.7                                               | 0.065               | 8.1                                               |
| CNF9   | CNF-NMe <sub>3</sub> <sup>+</sup> | THF/Tol              | 3.4                               | 0.005                             | 0.038               | 7.6                                               | 0.032               | 6.4                                               |
| CNF10  |                                   | THF/Acet             | 2.1                               | 0.003                             | 0.017               | 5.8                                               | 0.018               | 5.9                                               |
| CNF11  |                                   | Tol/Acet             | 1.0                               | 0.002                             | 0.015               | 7.6                                               | 0.016               | 8.1                                               |
| CNF12  |                                   | Tol                  | 5.2                               | 0.008                             | 0.078               | 9.7                                               | 0.096               | 12.0                                              |
| CNF13  |                                   | THF                  | 2.5                               | 0.004                             | 0.032               | 8.0                                               | 0.031               | 7.8                                               |
| CNF14  | CNF-PPh <sub>2</sub>              | THF/Tol              | 3.4                               | 0.005                             | 0.033               | 6.7                                               | 0.038               | 7.7                                               |
| CNF15  |                                   | THF/Acet             | 0.6                               | 0.001                             | 0.012               | 11.3                                              | 0.011               | 11.4                                              |
| CNF16  |                                   | Tol/Acet             | 1.0                               | 0.002                             | 0.013               | 6.3                                               | 0.013               | 6.3                                               |

<sup>a</sup> Tol = toluene and Acet = acetone.

<sup>b</sup> Metal loading has been calculated from the incorporation yield determined by atomic absorption of cobalt in the synthesis filtrates.

<sup>c</sup> Calculated values are bulk molar ratios based on the experimental metal loadings measured. The amount of metal taken into consideration for the calculations corresponds to the amount incorporated on the support. The amount of C taken into consideration corresponds to the amount of support used by considering that it is only constituted of carbon.



Table S9. Loading and XPS results for the incorporation of [HFeCo<sub>3</sub>(CO)<sub>12</sub>] (**1**) on different types of MWCNT.

| Sample | Support                             | Solvent <sup>a</sup> | Metal loading (wt.%) <sup>b</sup> | XPS                               |                     |                                                   |                     |                                                   |
|--------|-------------------------------------|----------------------|-----------------------------------|-----------------------------------|---------------------|---------------------------------------------------|---------------------|---------------------------------------------------|
|        |                                     |                      |                                   | Before activation                 |                     | After activation                                  |                     |                                                   |
|        |                                     |                      |                                   | Co/C <sub>calc</sub> <sup>c</sup> | Co/C <sub>exp</sub> | (Co/C) <sub>exp</sub> /<br>(Co/C) <sub>calc</sub> | Co/C <sub>exp</sub> | (Co/C) <sub>exp</sub> /<br>(Co/C) <sub>calc</sub> |
| MWCNT1 | MWCNT                               | Tol                  | 2.6                               | 0.004                             | 0.004               | 1.0                                               | 0.004               | 1.1                                               |
| MWCNT2 |                                     | THF                  | 4.6                               | 0.007                             | 0.012               | 1.7                                               | 0.012               | 1.7                                               |
| MWCNT3 | MWCNT-OX                            | Tol                  | 5.3                               | 0.008                             | 0.024               | 3.0                                               | 0.022               | 2.7                                               |
| MWCNT4 |                                     | THF                  | 5.3                               | 0.008                             | 0.016               | 2.0                                               | 0.017               | 2.1                                               |
| MWCNT5 | MWCNT-NMe <sub>3</sub> <sup>+</sup> | THF                  | 4.9                               | 0.008                             | 0.012               | 1.4                                               | 0.013               | 1.6                                               |
| MWCNT6 | MWCNT-PPh <sub>2</sub>              | Tol                  | 4.7                               | 0.007                             | 0.015               | 2.2                                               | 0.013               | 1.9                                               |

<sup>a</sup> Tol = toluene and Acet = acetone.

<sup>b</sup> Metal loading has been calculated from the incorporation yield determined by atomic absorption of cobalt in the synthesis filtrates.

<sup>c</sup> Calculated values are bulk molar ratios based on the experimental metal loadings measured. The amount of metal taken into consideration for the calculations corresponds to the amount incorporated on the support. The amount of C taken into consideration corresponds to the amount of support used by considering that it is only constituted of carbon.

Table S10. Loading and XPS results for the incorporation of  $(\text{NEt}_4)[\text{FeCo}_3(\text{CO})_{12}]$  (**2**) on different types of CNF.

| Sample | Support                           | Solvent <sup>a</sup> | Metal loading (wt.%) <sup>b</sup> | XPS                               |                     |                                                   |                     |                                                   |
|--------|-----------------------------------|----------------------|-----------------------------------|-----------------------------------|---------------------|---------------------------------------------------|---------------------|---------------------------------------------------|
|        |                                   |                      |                                   | Before activation                 |                     |                                                   | After activation    |                                                   |
|        |                                   |                      |                                   | Co/C <sub>calc</sub> <sup>c</sup> | Co/C <sub>exp</sub> | (Co/C) <sub>exp</sub> /<br>(Co/C) <sub>calc</sub> | Co/C <sub>exp</sub> | (Co/C) <sub>exp</sub> /<br>(Co/C) <sub>calc</sub> |
| CNF17  | CNF-LHT                           | THF/Acet             | 0                                 | No incorporation                  |                     |                                                   |                     |                                                   |
| CNF18  | CNF-PS                            | THF/Acet             | 0                                 | No incorporation                  |                     |                                                   |                     |                                                   |
| CNF19  | CNF-OX                            | THF/Acet             | 1.6                               | 0.002                             | 0.026               | 13.1                                              | 0.017               | 8.3                                               |
| CNF20  |                                   | THF                  | 0.9                               | 0.001                             | 0.008               | 8.2                                               | 0.011               | 10.7                                              |
| CNF21  | CNF-NMe <sub>3</sub> <sup>+</sup> | THF/Tol              | 0.9                               | 0.001                             | 0.017               | 16.9                                              | 0.017               | 17.5                                              |
| CNF22  |                                   | THF/Acet             | 1.6                               | 0.003                             | 0.030               | 10.1                                              | 0.028               | 9.4                                               |
| CNF24  |                                   | Tol/Acet             | 1.5                               | 0.002                             | 0.016               | 7.9                                               | 0.020               | 9.9                                               |
| CNF25  |                                   | THF                  | 0.4                               | 0.001                             | 0.006               | 5.9                                               | 0.007               | 7.6                                               |
| CNF26  | CNF-PPh <sub>2</sub>              | THF/Tol              | 0.5                               | 0.001                             | 0.006               | 6.4                                               | 0.007               | 6.9                                               |
| CNF27  |                                   | THF/Acet             | 1.2                               | 0.002                             | 0.015               | 7.8                                               | 0.019               | 9.6                                               |
| CNF28  |                                   | Tol/Acet             | 0.8                               | 0.001                             | 0.006               | 6.1                                               | 0.010               | 9.9                                               |

<sup>a</sup> Tol = toluene and Acet = acetone.

<sup>b</sup> Metal loading has been calculated from the incorporation yield determined by atomic absorption of cobalt in the synthesis filtrates.

<sup>c</sup> Calculated values are bulk molar ratios based on the experimental metal loadings measured. The amount of metal taken into consideration for the calculations corresponds to the amount incorporated on the support. The amount of C taken into consideration corresponds to the amount of support used by considering that it is only constituted of carbon.

Table S11. Loading and XPS results for the incorporation of  $(\text{NEt}_4)[\text{FeCo}_3(\text{CO})_{12}]$  (**2**) on different types of MWCNT.

| Sample  | Support                             | Solvent <sup>a</sup> | Metal loading (wt.%) <sup>b</sup> | XPS                               |                     |                                                   |                     |                                                   |
|---------|-------------------------------------|----------------------|-----------------------------------|-----------------------------------|---------------------|---------------------------------------------------|---------------------|---------------------------------------------------|
|         |                                     |                      |                                   | Co/C <sub>calc</sub> <sup>c</sup> | Before activation   |                                                   | After activation    |                                                   |
|         |                                     |                      |                                   |                                   | Co/C <sub>exp</sub> | (Co/C) <sub>exp</sub> /<br>(Co/C) <sub>calc</sub> | Co/C <sub>exp</sub> | (Co/C) <sub>exp</sub> /<br>(Co/C) <sub>calc</sub> |
| MWCNT7  | MWCNT                               | THF/Acet             | 1.2                               | 0.002                             | -                   | -                                                 | 0.002               | 1.0                                               |
| MWCNT8  | MWCNT-OX                            | THF/Acet             | 1.8                               | 0.003                             | 0.006               | 2.0                                               | 0.006               | 2.0                                               |
| MWCNT9  | MWCNT-NMe <sub>3</sub> <sup>+</sup> | THF/Acet             | 2.8                               | 0.004                             | 0.007               | 1.9                                               | 0.007               | 1.9                                               |
| MWCNT10 | MWCNT-PPh <sub>2</sub>              | THF/Acet             | 1.0                               | 0.002                             | 0.002               | 1.3                                               | 0.001               | 0.9                                               |

<sup>a</sup> Tol = toluene and Acet = acetone.

<sup>b</sup> Metal loading has been calculated from the incorporation yield determined by atomic absorption of cobalt in the synthesis filtrates.

<sup>c</sup> Calculated values are bulk molar ratios based on the experimental metal loadings measured. The amount of metal taken into consideration for the calculations corresponds to the amount incorporated on the support. The amount of C taken into consideration corresponds to the amount of support used by considering that it is only constituted of carbon.

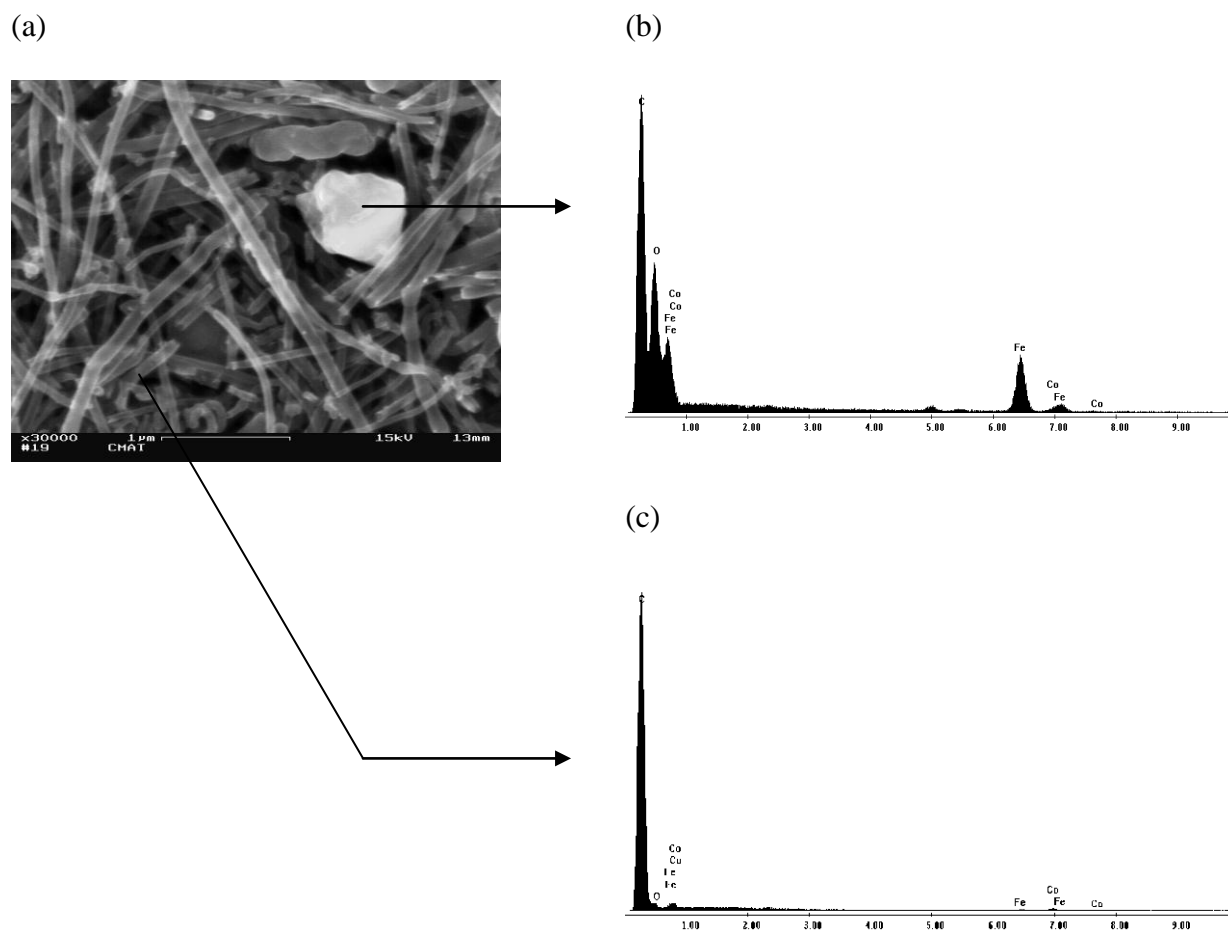

Figure S12. (a) SEM image of cluster  $[\text{HFeCo}_3(\text{CO})_{12}]$  (**1**) after thermal treatment on CNF-LHT, (b) EDXS analysis of the white particle in image (a) and (c) EDXS analysis of the zone on the bottom left-hand side in image (a).

(a)

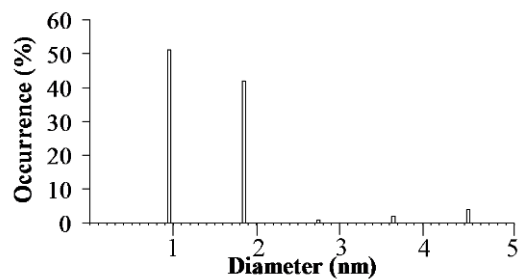

(b)

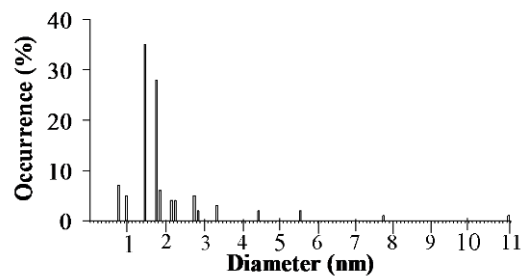

(c)

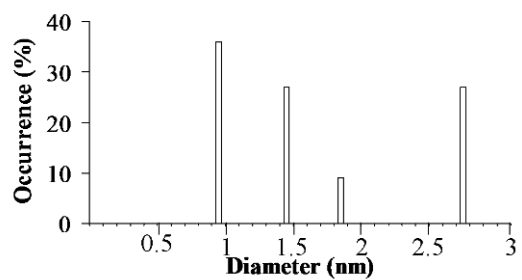

(d)

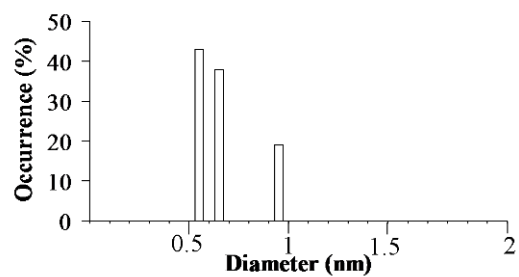

(e)

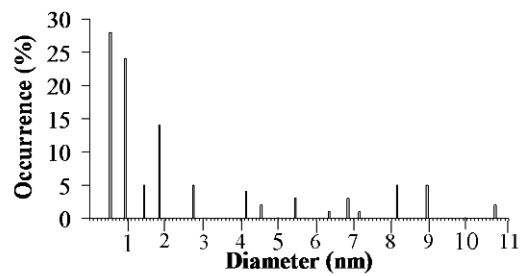

(f)

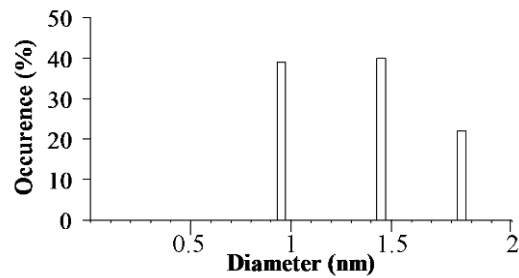

(g)

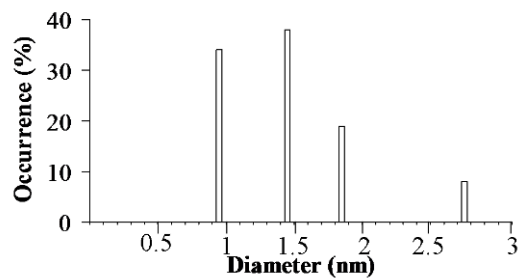

Figure S13. Histograms of particles sizes distributions (from TEM images) for cluster  $[\text{HFeCo}_3(\text{CO})_{12}]$  (**1**): (a) on CNF-LHT, (b) on CNF-OX, (c) on CNF-NMe<sub>3</sub><sup>+</sup>, (d) on CNF-PPh<sub>2</sub> from THF and (e) on CNF-PPh<sub>2</sub> from toluene and for cluster (NEt<sub>4</sub>)[FeCo<sub>3</sub>(CO)<sub>12</sub>] (**2**): (f) on CNF-OX and (g) on CNF-NMe<sub>3</sub><sup>+</sup>.
